# Supplementary material for: Template-directed synthesis of three new open-framework metal(ii) oxalates using Co(iii) complex as template
Source: Royal Society of Chemistry journal article supplement (doi:10.1039/c002658a), 2010-01-01
Supplement: c002658a.pdf [file c002658a.pdf]

## Electronic Supporting Information (ESI)

### **Template-directed synthesis of three new open-framework metal(II) oxalates using Co(III) complex as template**

Qinhe Pan, Qiang Chen, Wei-Chao Song, Tong-Liang Hu and Xian-He Bu\*

*Department of Chemistry, and Tianjin Key Laboratory of Metal & Molecule-based Material  
Chemistry, Nankai University, Tianjin 300071, China*

E-mail: [buxh@nankai.edu.cn](mailto:buxh@nankai.edu.cn).

Fax: +86-22-23502458.

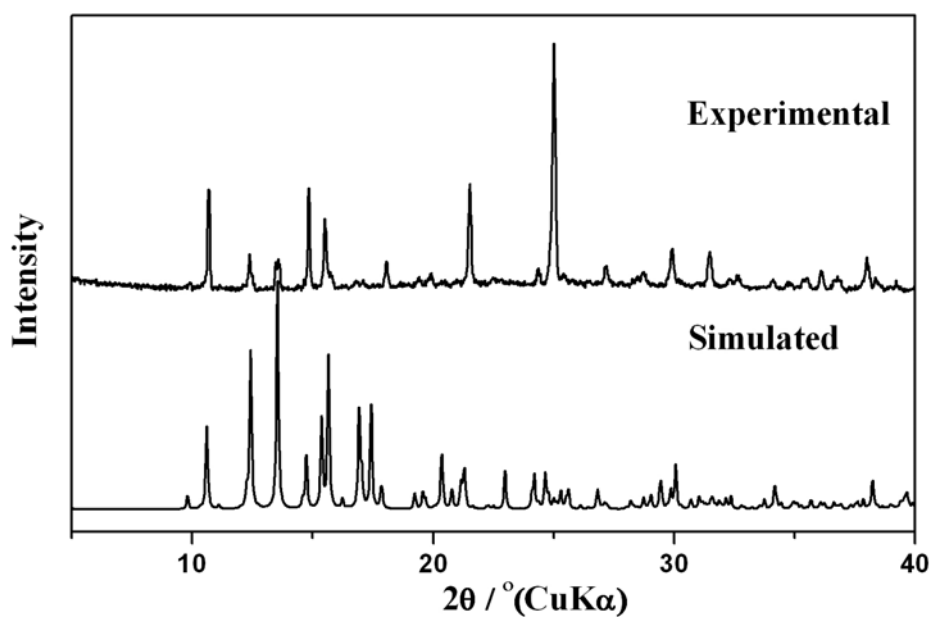

(a)

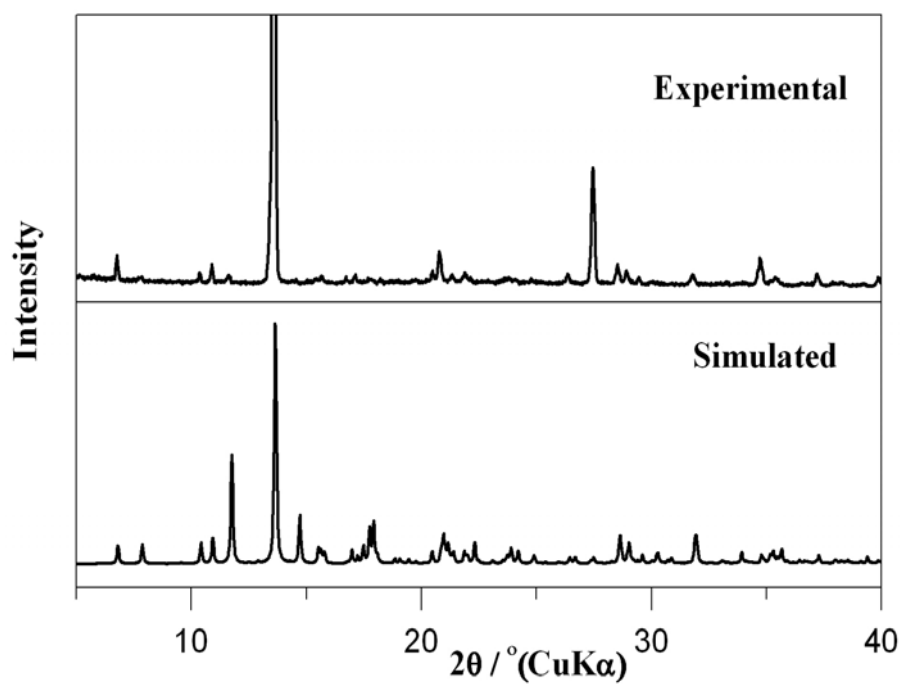

(b)

**Fig S1.** Simulated and experimental XPRD of (a) **1** and (b) **2**

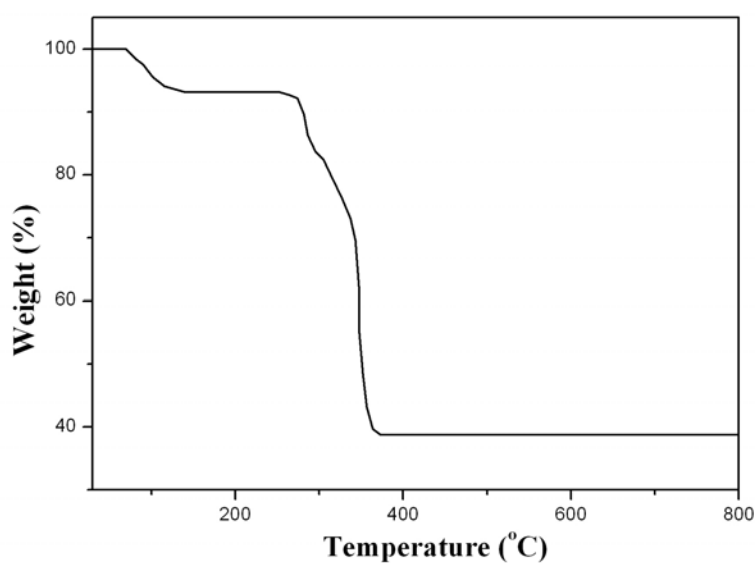

(a)

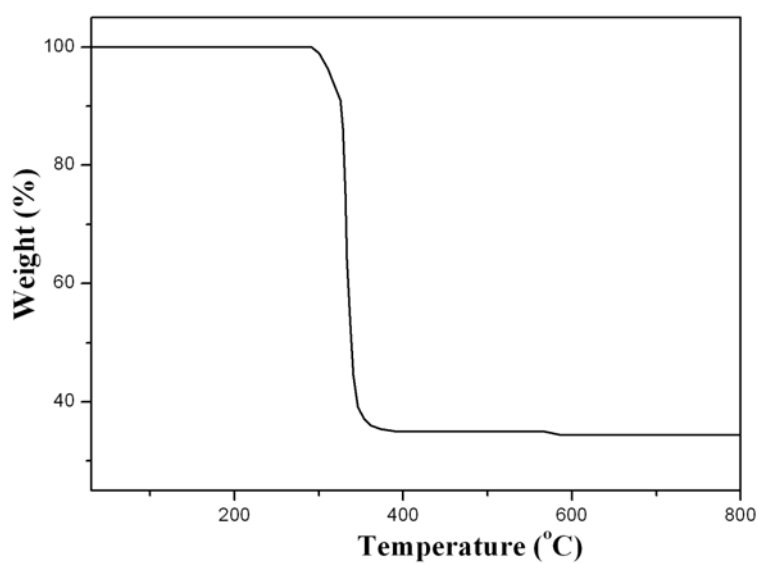

(b)

**Fig S2.** TGA of (a) **1** and (b) **2**. When exposed in atmosphere, part of the crystallization water in **1** will be lost in several days, and full of the crystallization water in **2** will be lost in a longer time, which is confirmed by the TGA results. The TGA curve of **1** gives only about 50% of calculated weight loss of crystallization water from 65 °C to 140 °C, while no weight loss is observed prior 290 °C in the TGA curve of **2**. The major weight loss for **1** and **2** happened at about 250 °C and 290 °C, respectively, which was related to the decomposition of the metal complexes and the collapse of the frameworks.
